# Supplementary material for: Alkyne insertion into cyclometallated pyrazole and imine complexes of iridium, rhodium and ruthenium; relevance to catalytic formation of carbo- and heterocycles
Source: Royal Society of Chemistry journal article supplement (doi:10.1039/c0dt00280a), 2010-01-01
Supplement: c0dt00280a.pdf [file c0dt00280a.pdf]

## Supplementary material

Figures showing structures of **3b, c**.

Table of crystallographic data for **3b, c**

Figure S1: Molecular structure and atom numbering scheme for **3b** with 50% displacement ellipsoids, all H atoms are omitted for clarity. Selected bond distances (Å) and angles (°): Rh—C(1) 2.061(7), Rh—N(1) 2.096(6), Rh—Cl(1) 2.411(2), C(1)—Rh—N(1) 84.5(2), C(1)—Rh—Cl(1) 91.5(2), N(1)—Rh—Cl(1) 87.29(19).

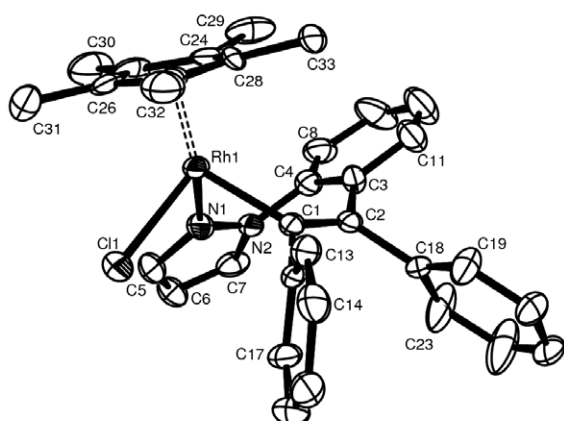

Figure S2: Molecular structure and atom numbering scheme for one molecule of **3c** with 50% displacement ellipsoids, all H atoms are omitted for clarity.

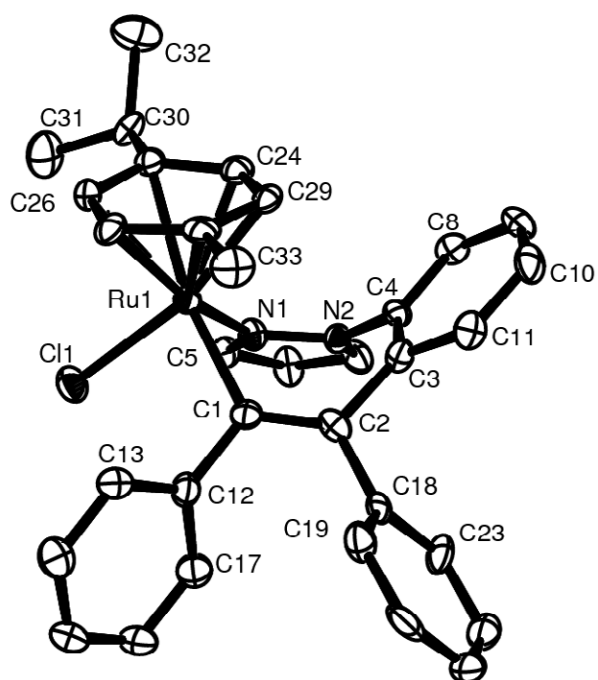

Table S1 Crystallographic data for **3b, c**

|                                               | <b>3b</b>                                           | <b>3c</b>                                                                                       |
|-----------------------------------------------|-----------------------------------------------------|-------------------------------------------------------------------------------------------------|
| Empirical formula                             | C <sub>33</sub> H <sub>32</sub> ClN <sub>2</sub> Rh | C <sub>132</sub> H <sub>130</sub> Cl <sub>4</sub> N <sub>8</sub> O <sub>3</sub> Ru <sub>4</sub> |
| Formula weight                                | 594.97                                              | 2422.52                                                                                         |
| Temperature                                   | 150(2) K                                            | 150(2) K                                                                                        |
| Crystal system                                | Monoclinic                                          | Orthorhombic                                                                                    |
| Space group                                   | P2(1)/c                                             | Pca2(1)                                                                                         |
| a/ Å                                          | 16.093(16)                                          | 23.312(3)                                                                                       |
| b/ Å                                          | 10.196(10)                                          | 13.9149(18)                                                                                     |
| c/ Å                                          | 17.116(17)                                          | 16.938(2)                                                                                       |
| $\alpha$ °                                    | 90°.                                                | 90°.                                                                                            |
| $\beta$ °                                     | 98.266(17)                                          | 90°.                                                                                            |
| $\gamma$ °                                    | 90°.                                                | 90°.                                                                                            |
| U/ Å <sup>3</sup>                             | 2779(5)                                             | 5494.4(12)                                                                                      |
| Z                                             | 4                                                   | 2                                                                                               |
| Density (calc.) Mg/m <sup>3</sup>             | 1.422                                               | 1.464                                                                                           |
| Abs. coefficient/ mm <sup>-1</sup>            | 0.735                                               | 0.696                                                                                           |
| F(000)                                        | 1224                                                | 2492                                                                                            |
| Crystal size mm                               | 0.24 x 0.15 x 0.10                                  | 0.18 x 0.13 x 0.11                                                                              |
| Theta range                                   | 2.33 to 26.00                                       | 1.46 to 26.00                                                                                   |
| Index ranges                                  | -19<=h<=19, -12<=k<=12,<br>-21<=l<=21               | -28<=h<=28, -17<=k<=17,<br>-20<=l<=20                                                           |
| Reflections collected                         | 20947                                               | 41341                                                                                           |
| Independent reflections (R <sub>int</sub> )   | 5457 [R(int) = 0.2108]                              | 10752 [R(int) = 0.0988]                                                                         |
| Data / restraints / parameters                | 5457 / 0 / 339                                      | 10752 / 1 / 692                                                                                 |
| Goodness-of-fit, F <sup>2</sup>               | 1.133                                               | 0.887                                                                                           |
| Final R indices [I>2 $\sigma$ (I)]            | R1 = 0.0833, wR2 = 0.1803                           | R1 = 0.0461, wR2 = 0.0724                                                                       |
| R indices (all data)                          | R1 = 0.1218, wR2 = 0.1993                           | R1 = 0.0646, wR2 = 0.0775                                                                       |
| Largest diff. peak and hole/e Å <sup>-3</sup> | 1.074 and -1.762                                    | 0.814 and -0.440                                                                                |

Supplementary Material (ESI) for Dalton Transactions

This journal is (c) The Royal Society of Chemistry 2010
